# Supplementary material for: Mg-substituted Prussian blue as a low-strain cathode material for aqueous Fe-ion batteries
Source: Royal Society of Chemistry journal article supplement (doi:10.1039/d2cc06885k), 2023-01-01
Supplement: d2cc06885k1.pdf [file d2cc06885k1.pdf]

## Electronic Supplementary Information

### Mg-substituted Prussian blue as low-strain cathode material for aqueous Fe-ion batteries

#### Experimental section

##### Materials synthesis

A facile co-precipitation method was performed to prepare MgFeHCF nanocubes. In brief, 2.5 mmol FeSO<sub>4</sub> and 2.5 mmol MgSO<sub>4</sub> were dissolved in 100 ml de-ionized (DI) water to form solution A, while 2.5 mmol K<sub>4</sub>Fe(CN)<sub>6</sub> was dissolved in 100 ml DI water to form solution B. This reaction was carried out by adding solution A into solution B drop by drop for 10 minutes with constant stirring at 60°C. Subsequently, after stirring for 4 hours, the product was washed thoroughly by centrifugation with DI water several times and then allowed to dry in an oven at 70°C overnight. The original FeHCF was synthesized similarly without MgSO<sub>4</sub>.

##### Material characterizations

Scanning electron microscope (SEM)/Transmission electron microscope (TEM) (HRTEM and Energy dispersive spectrometer) were performed with JEOL JSM-7100F scanning electron microscope and JEM-2100F/Titan G2 60-300 transmission electron microscope. X-ray diffraction patterns were recorded by using a D2 discover X-ray diffractometer with Cu K $\alpha$  radiation ( $\lambda = 1.054056 \text{ \AA}$ ), in a  $2\theta$  angular range of 10°-70°. For *in situ* XRD measurements, the battery system was assembled by a mold where the electrode was covered by an X-ray-transparent polyethylene film. The *in situ* XRD signals were acquired by the planar detector in a still mode during the discharge-charge process, and patterns were collected every 2 min (using D8 discover X-ray diffractometer). Raman spectra were collected by a Renishaw INVIA micro-Raman spectroscopy system. Fourier Transform infrared spectroscopy (FT-IR) was measured using a 60-SXB IR spectrometer. X-ray photoelectron spectroscopy (XPS) tests were carried out by the VG Multi Lab 2000. The element contents were

determined by ICP-OES (JY/T015-1996).

### Electrochemical characterizations

The CR2016 coin cells were assembled with the commercial iron foil anode, 0.5 M FeSO<sub>4</sub> aqueous electrolyte, and MgFeHCF cathode. Glass fibre separator (GF/A, Whatman) was used. To manufacture the cathode electrodes, a slurry was mixed at a weight ratio of 70% active materials, 20% acetylene black, and 10% PVDF in NMP solvent and was cast on a graphite paper and dried at 80°C overnight. The mass loading of active materials was about 2 mg cm<sup>-2</sup>. Cell cycling was performed using a battery tester (NEWARE, Shenzhen, China). Cyclic Voltammetry (CV) tests were conducted on EC-LAB. Electrochemical Impedance Spectroscopy (EIS) tests were conducted from 0.01 Hz to 10 MHz with an amplitude of 10mV via Autolab PGSTAT302N. The Fe<sup>2+</sup> diffusion coefficients ( $D_{Fe^{2+}}$ ) was calculated by the simplified equations:

$$D = \frac{R^2 T^2}{2 A^2 n^4 F^4 C^2 \sigma^2} \quad \text{Eq. 1.}$$

$$Z_{re} = R_e + R_{ct} + \sigma \omega^{1/2} \quad \text{Eq. 2.}$$

Where R is the gas constant, T is the absolute temperature, A is the surface area of the electrode, n is the number of transferred electrons per molecule upon cycling, F is the Faraday constant, C is the concentration of Fe ion, and  $\sigma$  is the Warburg coefficient. A Land battery test system was applied to perform Galvanostatic Intermittent Titration Technique (GITT) testing at a current density of 50 mA g<sup>-1</sup> from 0.2 to 1.2 V. The  $D_{Fe^{2+}}$  can be calculated by the following equation:

$$D = \frac{4}{\pi \tau} \left( \frac{m_B V_m}{M_B S} \right)^2 \left( \frac{\Delta E_s}{\Delta E_\tau} \right)^2 \left( \tau \ll \frac{L^2}{D_{Fe^{2+}}} \right) \quad \text{Eq. 3.}$$

Where  $m_B$ ,  $V_m$ , and  $M_B$  represent the active mass, the molar volume, and the molar mass of the MgFeHCF material, respectively.  $\tau$  signifies the duration of a current pulse, and  $S$  is the geometric surface of the MgFeHCF electrode.  $\Delta E_s$  represents the voltage gap between the two steady-state voltages in a single-step GITT process, and

$\Delta E_\tau$  is the voltage variation during a current pulse (Fig. S3a and b). All the tests were performed at room temperature.

### **Computational details**

All calculations in this study were performed with the Vienna ab initio Simulation Package (VASP)<sup>1</sup> within the frame of density functional theory (DFT). The exchange-correlation interactions of electron were described via the generalized gradient approximation (GGA) with PBE functional,<sup>2</sup> and the projector augmented wave (PAW) method<sup>3</sup> was used to describe the interactions of electron and ion. Additionally, the DFT-D3 method<sup>4, 5</sup> was used to account for the long-range van der Waals forces present within the system. The Monkhorst-Pack scheme<sup>6</sup> with a 2 x 2 x 2 k-point mesh was used for the integration in the irreducible Brillouin zone. The kinetic energy cut-off of 460 eV was chosen for the plane wave expansion. The lattice parameters and ionic position were fully relaxed, and the total energy was converged within 10<sup>-5</sup> eV per formula unit. The final forces on all ions are less than 0.02/Å.

**Table S1.** Structure parameters of MgFeHCF.

|      |     | x    | y    | z     | Occ.  | U     | Site | Sym. |
|------|-----|------|------|-------|-------|-------|------|------|
| 1 Fe | Fe3 | 0    | 0    | 0.5   | 0.826 | 0.062 | 4b   | m-3m |
| 2 Fe | Fe2 | 0    | 0    | 0     | 1     | 0.07  | 4a   | m-3m |
| 3 C  | C1  | 0    | 0    | 0.175 | 1     | 0.059 | 24c  | 4m.m |
| 4 N  | N1  | 0    | 0    | 0.286 | 1     | 0.067 | 24c  | 4m.m |
| 5 K  | K1  | 0.25 | 0.25 | 0.25  | 0.553 | 0.236 | 8c   | -43m |
| 6 Mg | Mg1 | 0    | 0    | 0.5   | 0.174 | 0.062 | 4b   | m-3m |

**Table S2.** ICP and elemental analysis results of MgFeHCF and FeHCF.

|         | K content | Fe content | C content | N content | Mg content |
|---------|-----------|------------|-----------|-----------|------------|
| MgFeHCF | 0.24      | 0.96       | 2.9       | 2.91      | 0.04       |
| FeHCF   | 0.08      | 1          | 2.59      | 2.67      |            |

**Table S3.** Compositions of the MgFeHCF and FeHCF and Theoretical Capacity

| sample  | formula                                                                                                             | theoretical capacity<br>(mAh g <sup>-1</sup> ) |
|---------|---------------------------------------------------------------------------------------------------------------------|------------------------------------------------|
| MgFeHCF | K <sub>0.45</sub> Mg <sub>0.04</sub> Fe <sub>0.96</sub> [Fe(CN) <sub>6</sub> ] <sub>0.9</sub> ·1.23H <sub>2</sub> O | 94                                             |
| FeHCF   | K <sub>0.14</sub> Fe[Fe(CN) <sub>6</sub> ] <sub>0.81</sub> ·1.89H <sub>2</sub> O                                    | 100.3                                          |

Meanwhile, the possible electrochemical reaction formula can be expressed as:

For the MgFeHCF:

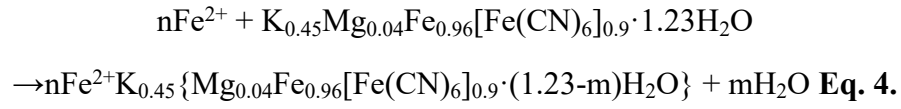

For the FeHCF:

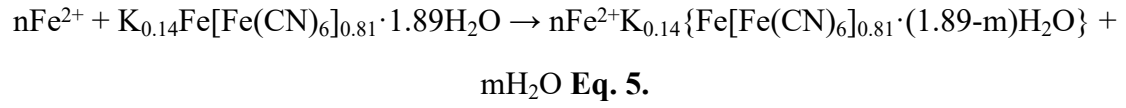

**Table S4.** Comparison of volume changes of several materials.

| Cathode                                                                                        | Volume Change | System |
|------------------------------------------------------------------------------------------------|---------------|--------|
| HW-PB <sup>7</sup>                                                                             | 5.54%         | SIBs   |
| K <sub>0.220</sub> Fe[Fe(CN) <sub>6</sub> ] <sub>0.805</sub> 4.01H <sub>2</sub> O <sup>8</sup> | 4.96%         | KIBs   |
| Fe-PBA <sup>9</sup>                                                                            | 2.47%         | LIBs   |
| Li <sub>1.2</sub> Ni <sub>0.4</sub> Ru <sub>0.4</sub> O <sub>2</sub> <sup>10</sup>             | 2.63%         | LIBs   |
| ZnHCF <sup>11</sup>                                                                            | 3%            | K/ZIBs |
| LiFePO <sub>4</sub> <sup>12</sup>                                                              | 6.8%          | LIBs   |
| Co-NVO <sup>13</sup>                                                                           | 0.6%          | AZIBs  |

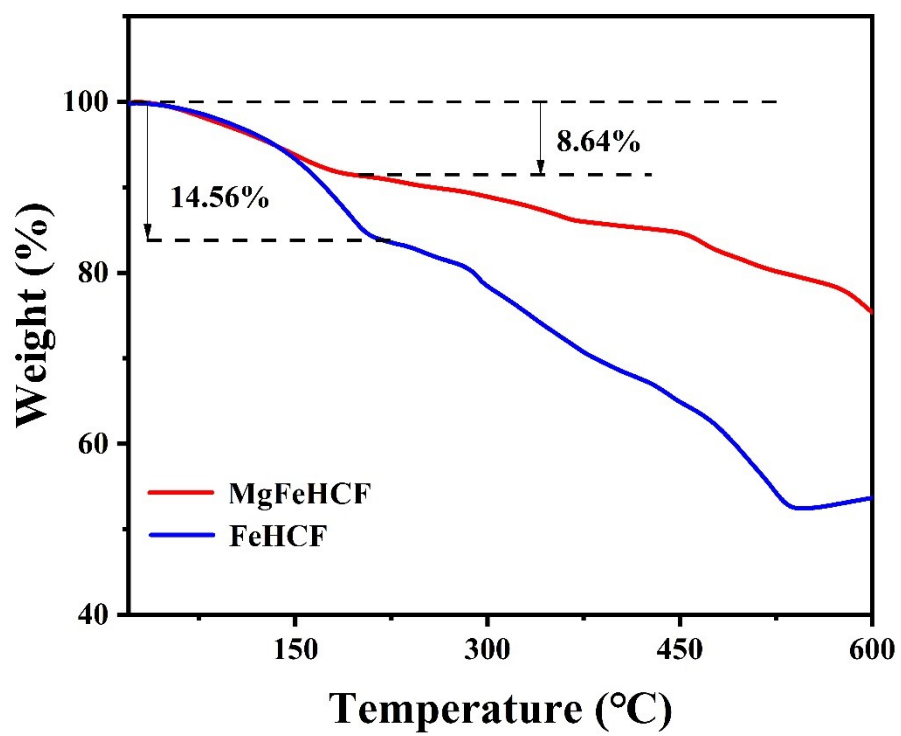

**Fig. S1** TGA curves of MgFeHCF and FeHCF.

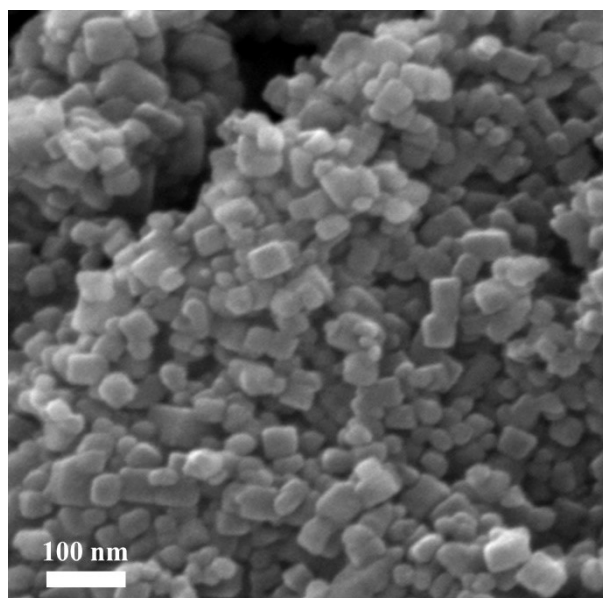

**Fig. S2** SEM image of FeHCF.

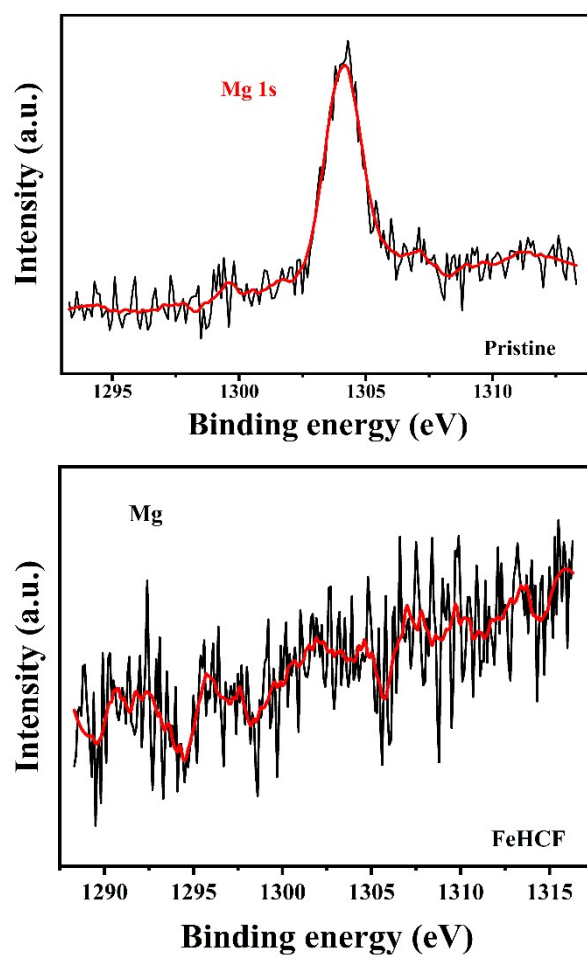

**Fig. S3** Mg 1s XPS spectra of MgFeHCF and FeHCF.

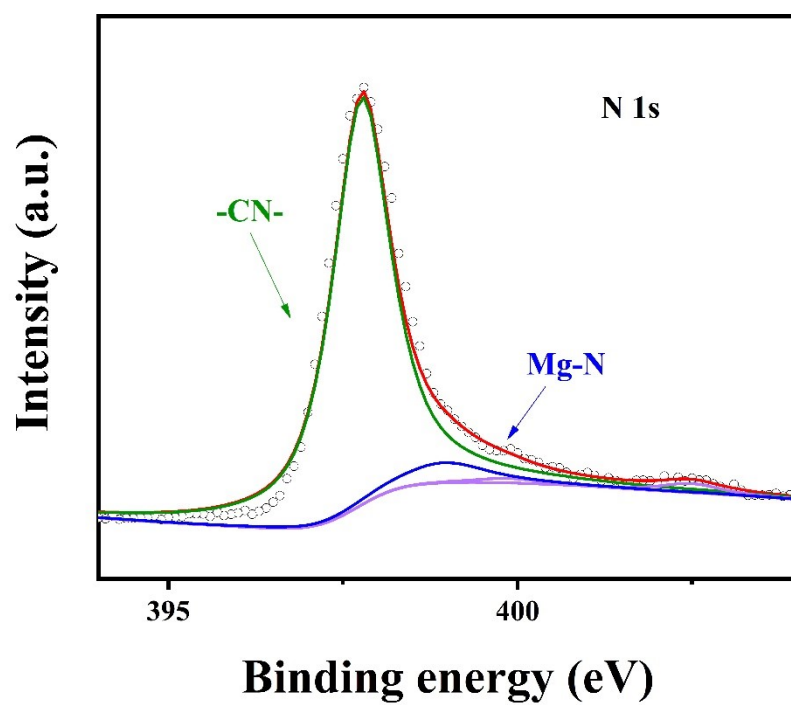

**Fig. S4** N 1s XPS spectra of MgFeHCF.

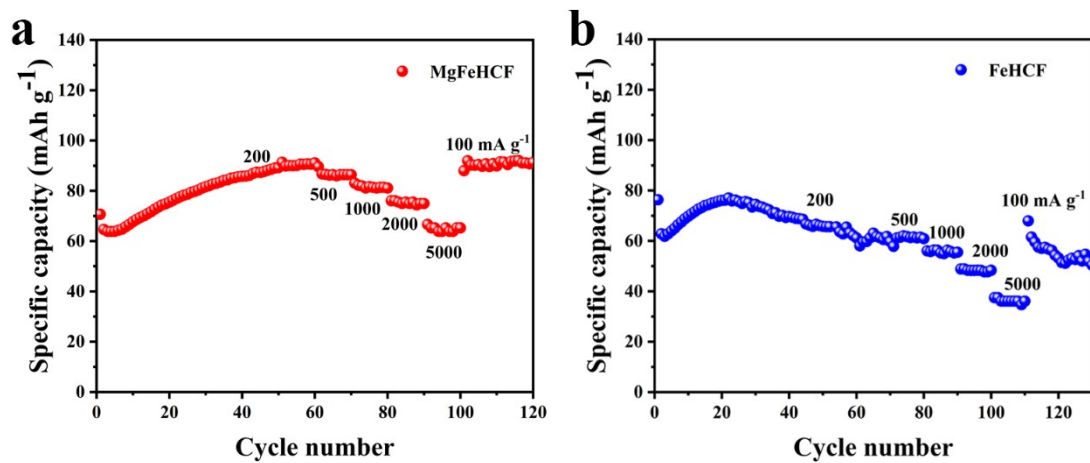

**Fig. S5** The activation process and rate performance of (a) MgFeHCF and (b) FeHCF.

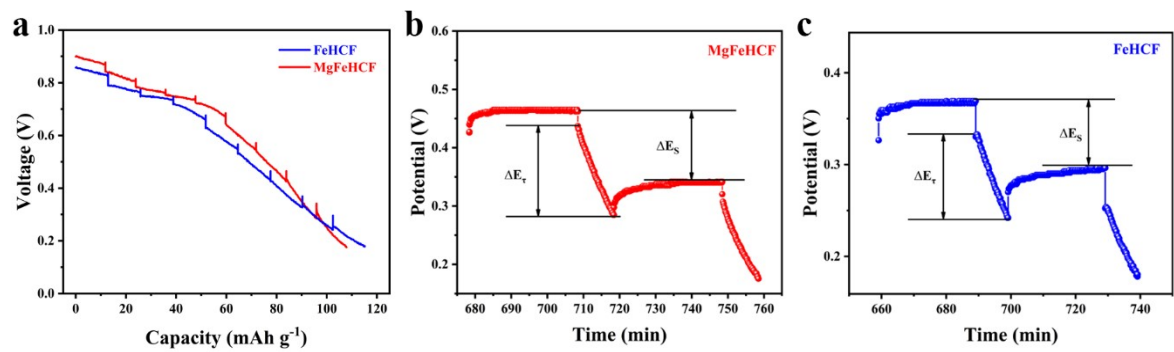

**Fig. S6** (a) GITT curves of MgFeHCF and FeHCF.  $E$  vs.  $\tau$  curves for a single step in GITT experiments of (b) MgFeHCF and (c) FeHCF.

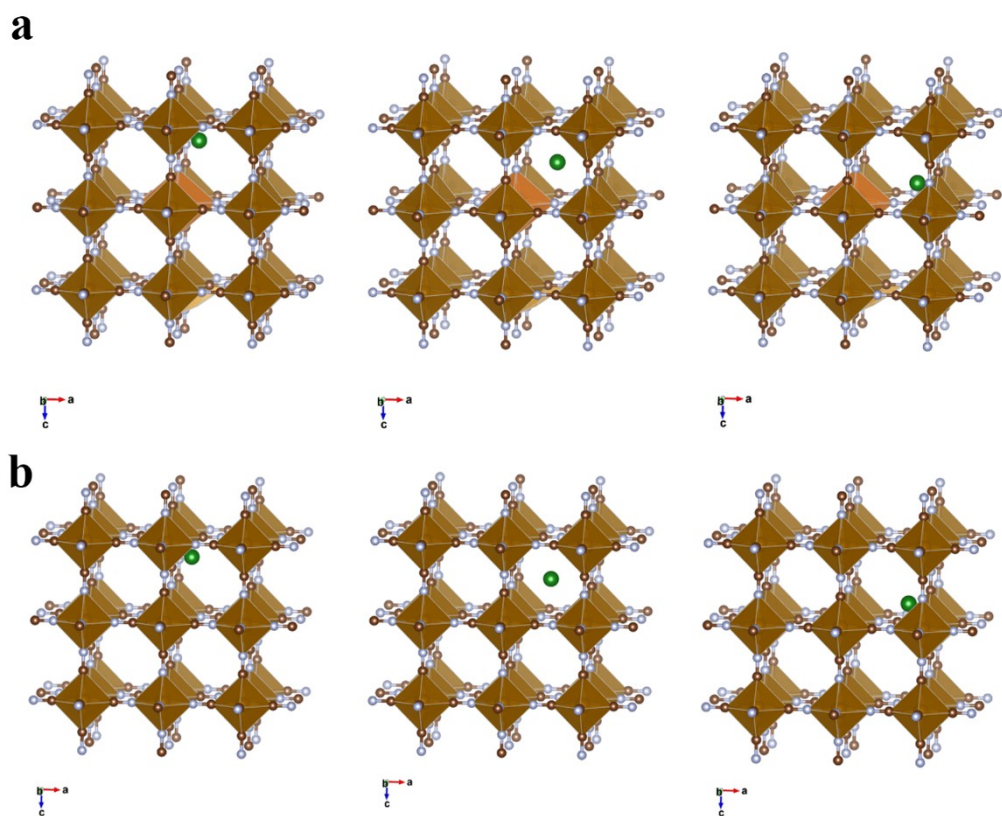

**Fig. S7** The transition state of an iron-ion diffusion within the lattice of the (a) MgFeHCF and (b) FeHCF model structure.

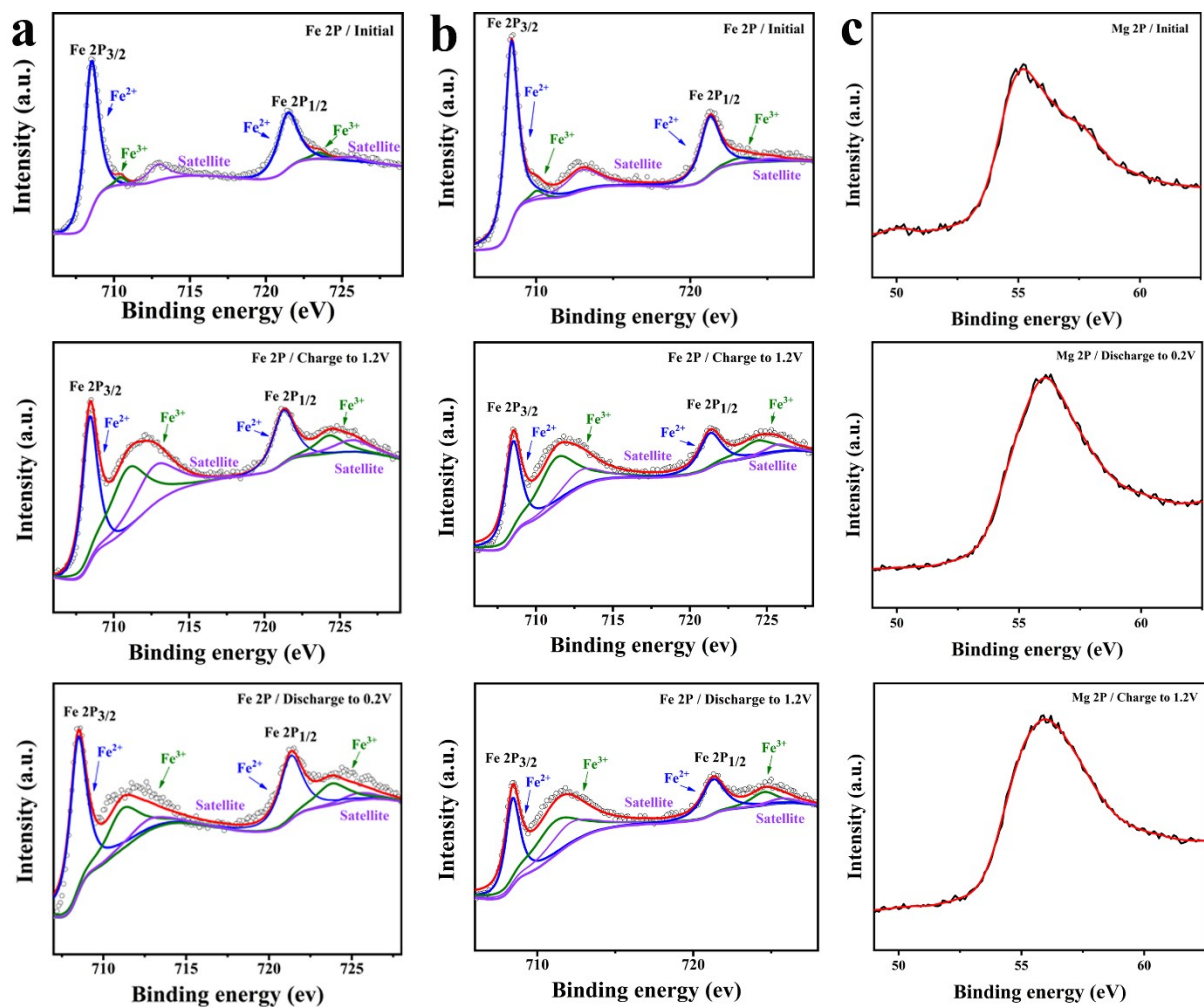

**Fig. S8** XPS spectra of Fe 2p (a) MgFeHCF, (b) FeHCF and Mg 2p in (c) MgFeHCF.

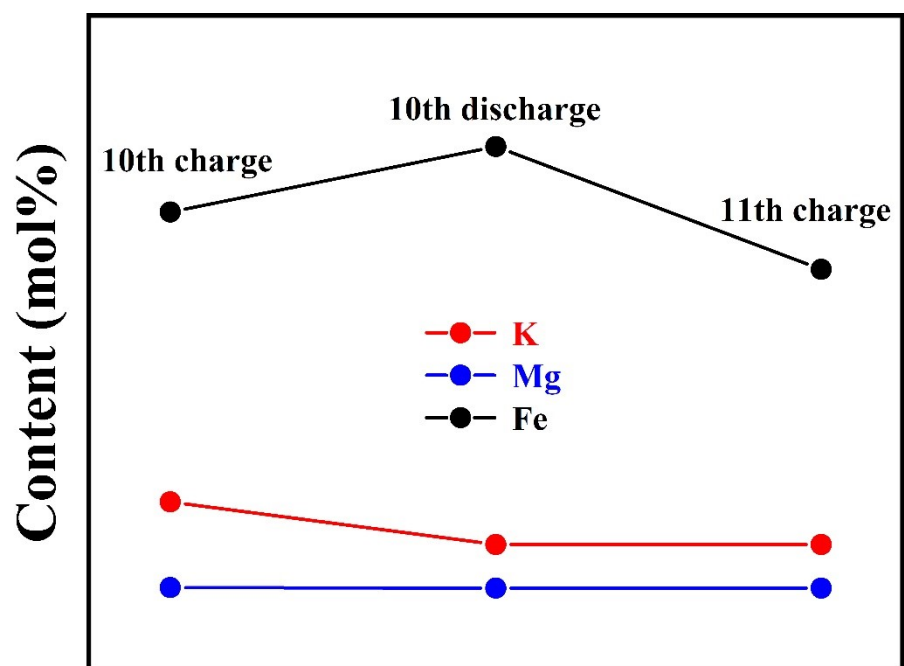

**Fig. S9** Content changes of K, Fe and Mg of MgFeHCF during charge and discharge process.

## Supplementary references

1. G. Kresse, J. Furthmuller, *Phys. Rev. B.* **1996**, 54, 11169-11186.
2. J. P. Perdew, K. Burke, M. Ernzerhof, *Phys. Rev. Lett.* **1996**, 77, 3865–3868.
3. G. Kresse; J. Joubert, *Phys. Rev. B.* **1999**, 59, 1758-1775.
4. S. Grimme, J. Antony, S. Ehrlich, H. Krieg, *J. Chem. Phys.* **2010**, 132.
5. S. Grimme, S. Ehrlich, L. Goerigk, *J Comput Chem* **2011**, 32, 1456-1465.
6. H. J. Monkhorst, J. D. Pack, *Phys. Rev. B.* **1976**, 13, 5188-5192.
7. J. Hu, H. Tao, M. Chen, Z. Zhang, S. Cao, Y. Shen, K. Jiang, M. Zhou, *ACS Appl. Mater. Interfaces* **2022**, 14, 12234-12242.
8. C. Zhang, Y. Xu, M. Zhou, L. Liang, H. Dong, M. Wu, Y. Yang, Y. Lei, *Adv. Funct. Mater.* **2017**, 27.
9. J.-H. Lee, J.-G. Bae, H. J. Lee, J. H. Lee, *J. Energy Chem.* **2022**, 70, 121-128.
10. N. Li, M. Sun, W. H. Kan, Z. Zhuo, S. Hwang, S. E. Renfrew, M. Avdeev, A. Huq, B. D. McCloskey, D. Su, W. Yang, W. Tong, *Nat. Commun.* **2021**, 12, 2348.
11. Q. Li, K. Ma, C. Hong, Z. Yang, C. Qi, G. Yang, C. Wang, *Energy Storage Mater.* **2021**, 42, 715-722.
12. C. Delmas, M. Maccario, L. Croguennec, F. Le Cras, F. Weill, *Nat. Mater.* **2008**, 7, 665-671.
13. M. Du, Z. Miao, H. Li, F. Zhang, Y. Sang, L. Wei, H. Liu, S. Wang, *Nano Energy* **2021**, 89.
